# Supplementary material for: Pto Kinase Binds Two Domains of AvrPtoB and Its Proximity to the Effector E3 Ligase Determines if It Evades Degradation and Activates Plant Immunity
Source: PubMed Central journal article supplement (PMC4110037; doi:10.1371/journal.ppat.1004227), 2014-07-24

# Figure S1

A

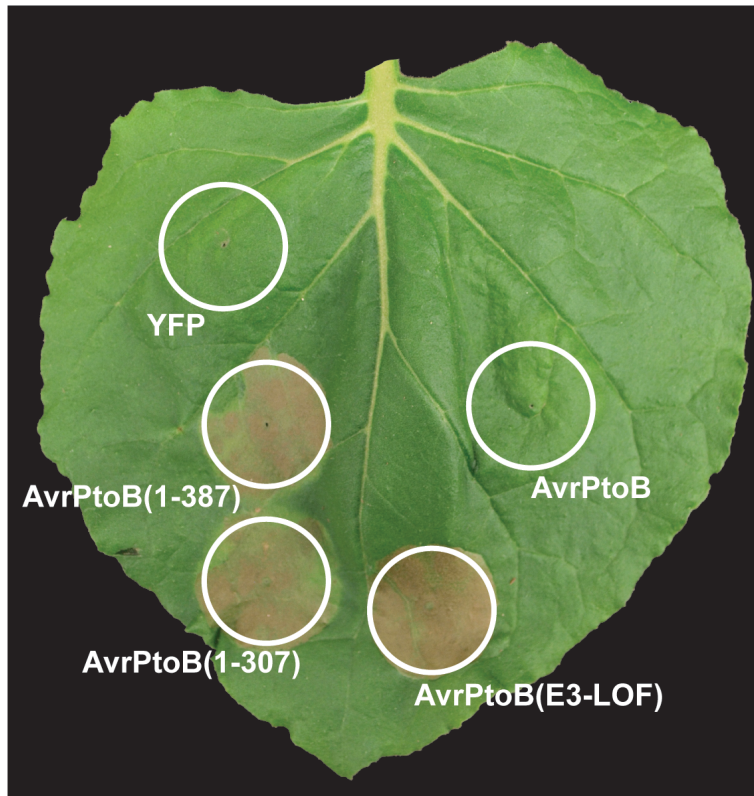

B

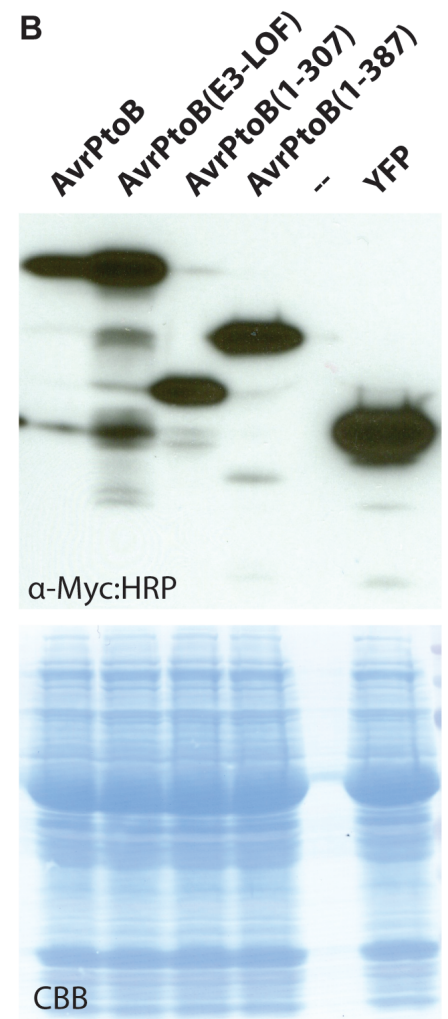

C

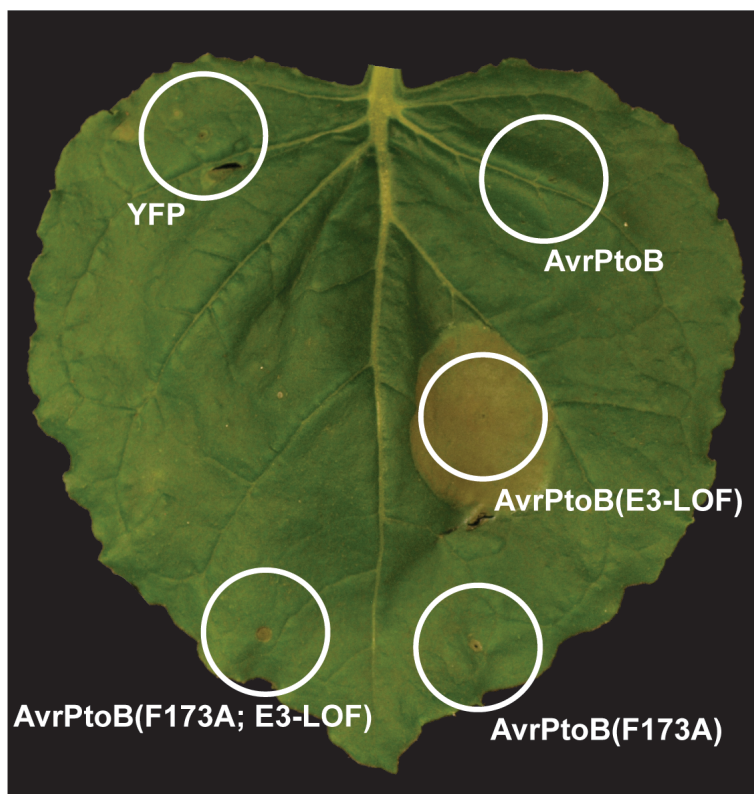

Supplement: ppat.1004227.s001.pdf [file ppat.1004227.s001.pdf]
