# Supplementary material for: Pto Kinase Binds Two Domains of AvrPtoB and Its Proximity to the Effector E3 Ligase Determines if It Evades Degradation and Activates Plant Immunity
Source: PubMed Central journal article supplement (PMC4110037; doi:10.1371/journal.ppat.1004227), 2014-07-24
Supplement: ppat.1004227.s002.pdf [file ppat.1004227.s002.pdf]

**A**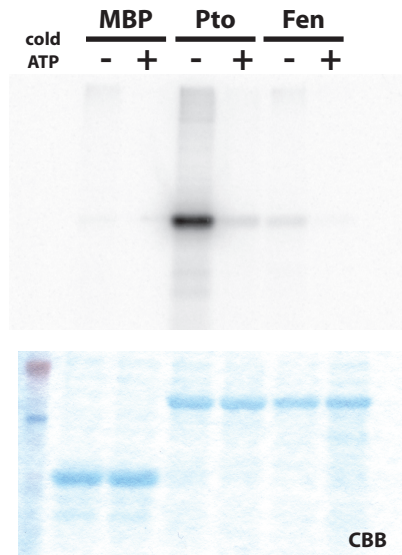**B**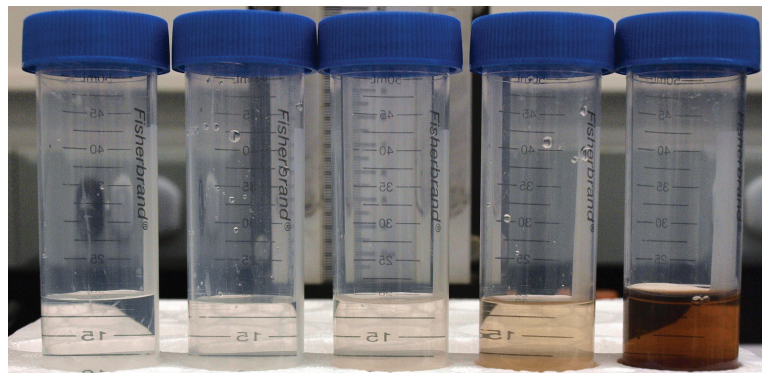**pH****6.8****7.0****7.5****8.0****9.2**
