# Supplementary material for: Pto Kinase Binds Two Domains of AvrPtoB and Its Proximity to the Effector E3 Ligase Determines if It Evades Degradation and Activates Plant Immunity
Source: PubMed Central journal article supplement (PMC4110037; doi:10.1371/journal.ppat.1004227), 2014-07-24
Supplement: ppat.1004227.s004.pdf [file ppat.1004227.s004.pdf]

**Table S1**  
**Oligonucleotides used in this work**

| Design. | sequence                                       | use                                                         | features                                                 |
|---------|------------------------------------------------|-------------------------------------------------------------|----------------------------------------------------------|
| oJM08   | atggcgggtatcaatagagcg                          | fwd oligo for all AvrPtoB blunt end clonings                | Contains Start codon                                     |
| oJM09   | tcaggggactattctaaaagc                          | rev oligo to clone FL AvrPtoB blunt end                     | contains STOP codon                                      |
| oJM154  | tggggactattctaaaagc                            | rev oligo to clone AvrPtoB entry vectors without STOP codon | removes STOP codon and corrects frame                    |
| oJM83   | gggaattcgggtatcaatagagcg                       | fwd oligo for all Y2H AvrPtoB clonings                      | Adds 5' EcoR I for in frame clonings into pEG202, pJG4-5 |
| oJM130  | gcgaattctcaggggactattctaaaagc                  | rec oligo for all Y2H AvrPtoB clonings                      | Adds 3' EcoR I for in frame clonings into pEG202, pJG4-5 |
| oJM53   | ctacatgtctttcaaggccgt                          | rev oligo to clone AvrPtoB(1-307) no STOP entry vectors     | removes STOP codon and corrects frame                    |
| oJM54   | ccaccgcaatcgtgttgc                             | rev oligo to clone AvrPtoB(1-387) no STOP entry vectors     | removes STOP codon and corrects frame                    |
| oJM14   | ttcagtcagctgcgcgaatttcgaaggccg                 | fwd oligo in vitro mutagenesis to generate AvrPtoB(T450A)   |                                                          |
| oJM15   | cggccttcgaaattgcgcgagctgactgaa                 | rev oligo in vitro mutagenesis to generate AvrPtoB(T450A)   |                                                          |
| oJM134  | caattcagtcagctgcgcgatatctcgaaggccgatgctgaatctg | fwd oligo in vitro mutagenesis to generate AvrPtoB(T450D)   |                                                          |
| oJM135  | cagattcagcatcggccttcgagatatcgcgcagctgactgaattg | rev oligo in vitro mutagenesis to generate AvrPtoB(T450D)   |                                                          |
| oS577   | gcagaatgtggcaattaaccaagtatcg                   | fwd oligo in vitro mutagenesis to generate AvrPtoB(G325A)   |                                                          |
| oS578   | cgatacttgggttaattgccacattctgc                  | rev oligo in vitro mutagenesis to generate AvrPtoB(G325A)   |                                                          |
| oJM433  | aattggacatagtgtctttggga                        | fwd oligo in vitro mutagenesis to generate Pto(G50S)        |                                                          |
| oJM434  | tcccaaagacactatgtccaatt                        | rev oligo in vitro mutagenesis to generate Pto(G50S)        |                                                          |
| oJM189  | atgggaagcaagtattccaa                           | fwd oligo for Fen entry vector clonings                     | Contains Start codon                                     |
| oJM190  | attcaggatcatcttgaat                            | rev oligo to clone Fen no STOP entry vectors                | removes STOP codon and corrects frame                    |
| oJM199  | tcattcaggatcatcttgaat                          | rev oligo to clone Fen entry vectors with STOP              | contains STOP codon                                      |
| oJM163  | atgggaagcaagtattctaa                           | fwd oligo for Pto entry vector clonings                     | Contains Start codon                                     |
| oJM165  | aaataacagactcttggaga                           | rev oligo to clone Pto no STOP entry vectors                | removes STOP codon and corrects frame                    |
| oJM164  | ttaaataacagactcttggga                          | rev oligo to clone Pto entry vectors with STOP              | contains STOP codon                                      |
| oJM109  | cttcgtcgagcggttcacatgccggagcggaggattac         | fwd oligo to generate AvrPtoB PID-E3 ligase fusions         | creates AvrPtoB fusion ORF fusing aa 200 to aa 388       |
| oJM108  | gtaatcctcccgtccggcatgtgaaccgctcgacgaag         | rev oligo to generate AvrPtoB PID-E3 ligase fusions         | creates AvrPtoB fusion ORF fusing aa 200 to aa 388       |

**Table S1**

All oligonucleotides were ordered from Integrated DNA Technologies (Coralville, IA , USA)
