# Supplementary material for: Pto Kinase Binds Two Domains of AvrPtoB and Its Proximity to the Effector E3 Ligase Determines if It Evades Degradation and Activates Plant Immunity
Source: PubMed Central journal article supplement (PMC4110037; doi:10.1371/journal.ppat.1004227), 2014-07-24
Supplement: ppat.1004227.s005.pdf [file ppat.1004227.s005.pdf]

**Table S2**  
**Vectors used for plasmid generation**

| Vector    | purpose                                                                                                      | Source                                          |
|-----------|--------------------------------------------------------------------------------------------------------------|-------------------------------------------------|
| pGEX-4T   | N-terminal GST fusions for expression in / purification from <i>E. coli</i>                                  | GE Healthcare Life Sciences, Pittsburg, PA, USA |
| pMAL-c2   | N-terminal MBP fusions for expression in / purification from <i>E. coli</i>                                  | New England Biolabs, Ipswich, MA, USA           |
| pEG202    | Yeast-two hybrid bait vector                                                                                 | Golemis et al. 2008                             |
| pJG4-5    | Yeast-two hybrid prey vector                                                                                 | Golemis et al. 2008                             |
| pJLSmart  | GW entry vector for expression in eukaryotes; N- and C-terminal fusions                                      | Mathieu et al. 2007                             |
| pJM51     | modified pJLSmart GW entry vector: contains Shine Dalgarno sequence for expression in prokaryotes            | Cheng et al. 2011                               |
| pGWB417   | GW destination vector for transient protein expression in <i>N. benthamiana</i> . Adds C-terminal 4x Myc tag | Nakagawa et al. 2007                            |
| pCPP5372  | GW destination vector for effector expression in <i>Pst.</i> Contains hrp promoter and C-terminal HA tag.    | Oh et al. 2007                                  |
| pBTEX:PRF | Co-expression of tomato PRF with Pto in <i>N. benthamiana</i> .                                              | Du et al. 2012                                  |
| pMAL-Pto  | Expression of Pto in <i>E. coli</i>                                                                          | Loh et al. 1995                                 |
| pMAL-Fen  | Expression of Fen in <i>E. coli</i>                                                                          | Loh et al. 1995                                 |

**Table S2**
