# Supplementary material for: Pto Kinase Binds Two Domains of AvrPtoB and Its Proximity to the Effector E3 Ligase Determines if It Evades Degradation and Activates Plant Immunity
Source: PubMed Central journal article supplement (PMC4110037; doi:10.1371/journal.ppat.1004227), 2014-07-24
Supplement: ppat.1004227.s006.pdf [file ppat.1004227.s006.pdf]

**Table S3**  
**Constructs generated in the course of this work**

| Designation | Vector   | Insert                  | comments                        |
|-------------|----------|-------------------------|---------------------------------|
| pJM99       | pJG4-5   | PID:E3 fusion           | generated by fusion PCR         |
| pJM107      | pJG4-5   | PID:E3-LOF fusion       | generated by fusion PCR         |
| pJM128      | pJG4-5   | AvrPtoB[(T450A)]        | in vitro mutagenesis            |
| pJM64       | pJM51    | AvrPtoB                 | PCR cloning into Sma I          |
| pJM70       | pJM51    | AvrPtoB[E3-LOF]         | in vitro mutagenesis            |
| pSS66       | pJM51    | AvrPtoB[(F173A)]        | in vitro mutagenesis            |
| pSS67       | pJM51    | AvrPtoB[(F173A) E3-LOF] | in vitro mutagenesis            |
| pJM122      | pJM51    | AvrPtoB[(T450A)]        | in vitro mutagenesis            |
| pJM123      | pJM51    | AvrPtoB[(T450D)]        | in vitro mutagenesis            |
| pJM65       | pJM51    | AvrPtoB[1-307]          | PCR cloning into Sma I          |
| pJM66       | pJM51    | AvrPtoB[1-387]          | PCR cloning into Sma I          |
| pPB04       | pJLSmart | Pto                     | PCR cloning into Sma I          |
| pJM212      | pJLSmart | Fen                     | PCR cloning into Sma I          |
| pJM482      | pJLSmart | Pto(G50S)               | in vitro mutagenesis            |
| pJM371      | pJLSmart | YFP                     | PCR cloning into Sma I          |
| pJM69       | pCPP5372 | AvrPtoB                 | LR recombination                |
| pJM155      | pCPP5372 | AvrPtoB[E3-LOF]         | LR recombination                |
| pJM292      | pCPP5372 | AvrPtoB[(F173A)]        | LR recombination                |
| pJM293      | pCPP5372 | AvrPtoB[(F173A) E3-LOF] | LR recombination                |
| pJM145      | pCPP5372 | AvrPtoB[(T450A)]        | LR recombination                |
| pJM146      | pCPP5372 | AvrPtoB[(T450D)]        | LR recombination                |
| pJM306      | pGWB417  | AvrPtoB                 | LR recombination                |
| pJM336      | pGWB417  | AvrPtoB[E3-LOF]         | LR recombination                |
| pJM349      | pGWB417  | AvrPtoB[(F173A)]        | LR recombination                |
| pJM414      | pGWB417  | AvrPtoB[(F173A) E3-LOF] | LR recombination                |
| pJM352      | pGWB417  | AvrPtoB[1-307]          | LR recombination                |
| pJM353      | pGWB417  | AvrPtoB[1-387]          | LR recombination                |
| pJM307      | pGWB417  | Pto                     | LR recombination                |
| pJM311      | pGWB417  | Fen                     | LR recombination                |
| pJM493      | pGWB417  | Pto(G50S)               | LR recombination                |
| pJM374      | pGWB417  | YFP                     | LR recombination                |
| pJM68       | pGEX-4T  | AvrPtoB                 | PCR cloning into EcoR I / Not I |
| pJM392      | pGEX-4T  | AvrPtoB[E3-LOF]         | PCR cloning into EcoR I         |
| pJM393      | pGEX-4T  | AvrPtoB[(T450A)]        | PCR cloning into EcoR I         |
| pJM394      | pGEX-4T  | AvrPtoB[(T450D)]        | PCR cloning into EcoR I         |
| pJM483      | pMAL-c2  | Pto(G50S)               | PCR cloning into EcoR I         |

**Table S3**

Complete sequences and vector maps in Gene Construction Kit (.GCK) format for all constructs are available upon request.
